# Supplementary material
Source: publisher site journal article supplement (https://www.dovepress.com/article/344138)
Supplement: Supplementary file 1 [file get_supplementary_file.php]

Additional file 1 Chemical information of main compounds in Ba Zhen Tang

| Herb      | MOL ID    | Molecule name                                                                                                               | MW                                               | OB (%) | DL    |      |
|-----------|-----------|-----------------------------------------------------------------------------------------------------------------------------|--------------------------------------------------|--------|-------|------|
| BS        | MOL001910 | 11alpha,12alpha-epoxy-3beta-23-dihydroxy-30-norolean-20-en-28,12beta-olide                                                  | 470.71                                           | 64.77  | 0.38  |      |
|           | MOL001918 | paeoniflorgenone                                                                                                            | 318.35                                           | 87.59  | 0.37  |      |
|           | MOL001919 | (3S,5R,8R,9R,10S,14S)-3,17-dihydroxy-4,4,8,10,14-pentamethyl-2,3,5,6,7,9-hexahydro-1H-cyclopenta[a]phenanthrene-15,16-dione | 358.52                                           | 43.56  | 0.53  |      |
|           | MOL001921 | Lactiflorin                                                                                                                 | 462.49                                           | 49.12  | 0.8   |      |
|           | MOL001924 | paeoniflorin                                                                                                                | 480.51                                           | 53.87  | 0.79  |      |
|           | MOL001925 | paeoniflorin_qt                                                                                                             | 318.35                                           | 68.18  | 0.4   |      |
|           | MOL001928 | albiflorin_qt                                                                                                               | 318.35                                           | 66.64  | 0.33  |      |
|           | MOL001930 | benzoyl paeoniflorin                                                                                                        | 584.62                                           | 31.27  | 0.75  |      |
|           | MOL000211 | Mairin                                                                                                                      | 456.78                                           | 55.38  | 0.78  |      |
|           | MOL000358 | beta-sitosterol                                                                                                             | 414.79                                           | 36.91  | 0.75  |      |
|           | MOL000359 | sitosterol                                                                                                                  | 414.79                                           | 36.91  | 0.75  |      |
|           | MOL000422 | kaempferol                                                                                                                  | 286.25                                           | 41.88  | 0.24  |      |
|           | MOL000492 | (+)-catechin                                                                                                                | 290.29                                           | 54.83  | 0.24  |      |
|           | RS        | MOL005401                                                                                                                   | ginsenoside Rg5_qt                               | 442.8  | 39.56 | 0.79 |
|           |           | MOL005399                                                                                                                   | alexandrin_qt                                    | 414.79 | 36.91 | 0.75 |
|           |           | MOL005384                                                                                                                   | suchilactone                                     | 368.41 | 57.52 | 0.56 |
|           |           | MOL005376                                                                                                                   | Panaxadiol                                       | 460.82 | 33.09 | 0.79 |
|           |           | MOL005360                                                                                                                   | malkangunin                                      | 432.56 | 57.71 | 0.63 |
|           |           | MOL005357                                                                                                                   | Gomisin B                                        | 514.62 | 31.99 | 0.83 |
| MOL005356 |           | Girinimbina                                                                                                                 | 263.36                                           | 61.22  | 0.31  |      |
| MOL005348 |           | Ginsenoside-Rh4_qt                                                                                                          | 458.8                                            | 31.11  | 0.78  |      |
| MOL005344 |           | ginsenoside rh2                                                                                                             | 622.98                                           | 36.32  | 0.56  |      |
| MOL005321 |           | Frutinone A                                                                                                                 | 264.24                                           | 65.9   | 0.34  |      |
| MOL005320 |           | arachidonate                                                                                                                | 304.52                                           | 45.57  | 0.2   |      |
| MOL005318 |           | Dianthramine                                                                                                                | 289.26                                           | 40.45  | 0.2   |      |
| MOL005317 |           | Deoxyharringtonine                                                                                                          | 515.66                                           | 39.27  | 0.81  |      |
| MOL005314 |           | Celabenzine                                                                                                                 | 379.55                                           | 101.88 | 0.49  |      |
| MOL005308 |           | Aposiopolamine                                                                                                              | 271.34                                           | 66.65  | 0.22  |      |
| MOL004492 |           | Chrysanthemaxanthin                                                                                                         | 584.96                                           | 38.72  | 0.58  |      |
| MOL003648 |           | Inermin                                                                                                                     | 284.28                                           | 65.83  | 0.54  |      |
| MOL002879 |           | Diop                                                                                                                        | 390.62                                           | 43.59  | 0.39  |      |
| MOL000787 |           | Fumarine                                                                                                                    | 353.4                                            | 59.26  | 0.83  |      |
| MOL000449 |           | Stigmasterol                                                                                                                | 412.77                                           | 43.83  | 0.76  |      |
| MOL000422 |           | kaempferol                                                                                                                  | 286.25                                           | 41.88  | 0.24  |      |
| MOL000358 |           | beta-sitosterol                                                                                                             | 414.79                                           | 36.91  | 0.75  |      |
| BZ        |           | MOL000022                                                                                                                   | 14-acetyl-12-senecioid-2E,8Z,10E-atractylentriol | 356.45 | 63.37 | 0.3  |

|    |           |                                                                                                                                                                           |        |       |      |
|----|-----------|---------------------------------------------------------------------------------------------------------------------------------------------------------------------------|--------|-------|------|
|    | MOL000020 | 12-senecieryl-2E,8E,10E-atractylentriol                                                                                                                                   | 312.39 | 62.4  | 0.22 |
|    | MOL000021 | 14-acetyl-12-senecieryl-2E,8E,10E-atractylentriol                                                                                                                         | 355.44 | 60.31 | 0.31 |
|    | MOL000049 | 3 $\beta$ -acetoxyatractylone                                                                                                                                             | 274.39 | 54.07 | 0.22 |
|    | MOL000028 | $\alpha$ -Amyrin                                                                                                                                                          | 426.8  | 39.51 | 0.76 |
|    | MOL000033 | (3S,8S,9S,10R,13R,14S,17R)-10,13-dimethyl-17-[(2R,5S)-5-propan-2-yl]octan-2-yl]-2,3,4,7,8,9,11,12,14,15,16,17-dodecahydro-1H-cyclopenta[a]phenanthren-3-ol                | 428.82 | 36.23 | 0.78 |
|    | MOL000072 | 8 $\beta$ -ethoxy atractylenolide III                                                                                                                                     | 276.41 | 35.95 | 0.21 |
| FL | MOL000300 | dehydroeburicoic acid                                                                                                                                                     | 453.75 | 44.17 | 0.83 |
|    | MOL000282 | ergosta-7,22E-dien-3 $\beta$ -ol                                                                                                                                          | 398.74 | 43.51 | 0.72 |
|    | MOL000283 | Ergosterol peroxide                                                                                                                                                       | 430.74 | 40.36 | 0.81 |
|    | MOL000275 | trametenolic acid                                                                                                                                                         | 456.78 | 38.71 | 0.8  |
|    | MOL000287 | 3 $\beta$ -Hydroxy-24-methylene-8-lanostene-21-oic acid                                                                                                                   | 470.81 | 38.7  | 0.81 |
|    | MOL000285 | (2R)-2-[(5R,10S,13R,14R,16R,17R)-16-hydroxy-3-keto-4,4,10,13,14-pentamethyl-1,2,5,6,12,15,16,17-octahydrocyclopenta[a]phenanthren-17-yl]-5-isopropyl-hex-5-enoic acid     | 482.77 | 38.26 | 0.82 |
|    | MOL000292 | poricoic acid C                                                                                                                                                           | 482.77 | 38.15 | 0.75 |
|    | MOL000279 | Cerevisterol                                                                                                                                                              | 430.74 | 37.96 | 0.77 |
|    | MOL000296 | hederagenin                                                                                                                                                               | 414.79 | 36.91 | 0.75 |
|    | MOL000276 | 7,9(11)-dehydropachymic acid                                                                                                                                              | 526.83 | 35.11 | 0.81 |
|    | MOL000289 | pachymic acid                                                                                                                                                             | 528.85 | 33.63 | 0.81 |
|    | MOL000280 | (2R)-2-[(3S,5R,10S,13R,14R,16R,17R)-3,16-dihydroxy-4,4,10,13,14-pentamethyl-2,3,5,6,12,15,16,17-octahydro-1H-cyclopenta[a]phenanthren-17-yl]-5-isopropyl-hex-5-enoic acid | 484.79 | 31.07 | 0.82 |
|    | MOL000273 | (2R)-2-[(3S,5R,10S,13R,14R,16R,17R)-3,16-dihydroxy-4,4,10,13,14-pentamethyl-2,3,5,6,12,15,16,17-octahydro-1H-cyclopenta[a]phenanthren-17-yl]-6-methylhept-5-enoic acid    | 470.76 | 30.93 | 0.81 |
|    | MOL000290 | Poricoic acid A                                                                                                                                                           | 498.77 | 30.61 | 0.76 |
|    | MOL000291 | Poricoic acid B                                                                                                                                                           | 484.74 | 30.52 | 0.75 |
| DG | MOL000358 | beta-sitosterol                                                                                                                                                           | 414.79 | 36.91 | 0.75 |
|    | MOL000449 | Stigmasterol                                                                                                                                                              | 412.77 | 43.83 | 0.76 |
| CX | MOL001494 | Mandenol                                                                                                                                                                  | 308.56 | 42    | 0.19 |
|    | MOL002135 | Myricanone                                                                                                                                                                | 356.45 | 40.6  | 0.51 |
|    | MOL002140 | Perlolirine                                                                                                                                                               | 264.3  | 65.95 | 0.27 |
|    | MOL002151 | senkyunone                                                                                                                                                                | 326.52 | 47.66 | 0.24 |
|    | MOL002157 | wallichilide                                                                                                                                                              | 412.57 | 42.31 | 0.71 |

|     |           |                                                                                                     |        |       |      |
|-----|-----------|-----------------------------------------------------------------------------------------------------|--------|-------|------|
|     | MOL000359 | sitosterol                                                                                          | 414.79 | 36.91 | 0.75 |
|     | MOL000433 | FA                                                                                                  | 441.45 | 68.96 | 0.71 |
| SDH | MOL000359 | sitosterol                                                                                          | 414.79 | 36.91 | 0.75 |
|     | MOL000449 | Stigmasterol                                                                                        | 412.77 | 43.83 | 0.76 |
| GC  | MOL001484 | Inermine                                                                                            | 284.28 | 75.18 | 0.54 |
|     | MOL001792 | DFV                                                                                                 | 256.27 | 32.76 | 0.18 |
|     | MOL000211 | Mairin                                                                                              | 456.78 | 55.38 | 0.78 |
|     | MOL002311 | Glycyrol                                                                                            | 366.39 | 90.78 | 0.67 |
|     | MOL000239 | Jaranol                                                                                             | 314.31 | 50.83 | 0.29 |
|     | MOL002565 | Medicarpin                                                                                          | 270.3  | 49.22 | 0.34 |
|     | MOL000354 | isorhamnetin                                                                                        | 316.28 | 49.6  | 0.31 |
|     | MOL000359 | sitosterol                                                                                          | 414.79 | 36.91 | 0.75 |
|     | MOL003656 | Lupiwighteone                                                                                       | 338.38 | 51.64 | 0.37 |
|     | MOL003896 | 7-Methoxy-2-methyl isoflavone                                                                       | 266.31 | 42.56 | 0.2  |
|     | MOL000392 | formononetin                                                                                        | 268.28 | 69.67 | 0.21 |
|     | MOL000417 | Calycosin                                                                                           | 284.28 | 47.75 | 0.24 |
|     | MOL000422 | kaempferol                                                                                          | 286.25 | 41.88 | 0.24 |
|     | MOL004328 | naringenin                                                                                          | 272.27 | 59.29 | 0.21 |
|     | MOL004805 | (2S)-2-[4-hydroxy-3-(3-methylbut-2-enyl)phenyl]-8,8-dimethyl-2,3-dihydropyrano[2,3-f]chromen-4-one  | 390.51 | 31.79 | 0.72 |
|     | MOL004806 | euchrenone                                                                                          | 406.56 | 30.29 | 0.57 |
|     | MOL004808 | glyasperin B                                                                                        | 370.43 | 65.22 | 0.44 |
|     | MOL004810 | glyasperin F                                                                                        | 354.38 | 75.84 | 0.54 |
|     | MOL004811 | Glyasperin C                                                                                        | 356.45 | 45.56 | 0.4  |
|     | MOL004814 | Isotrifoliol                                                                                        | 298.26 | 31.94 | 0.42 |
|     | MOL004815 | (E)-1-(2,4-dihydroxyphenyl)-3-(2,2-dimethylchromen-6-yl)prop-2-en-1-one                             | 322.38 | 39.62 | 0.35 |
|     | MOL004820 | kanzonols W                                                                                         | 336.36 | 50.48 | 0.52 |
|     | MOL004824 | (2S)-6-(2,4-dihydroxyphenyl)-2-(2-hydroxypropan-2-yl)-4-methoxy-2,3-dihydrofuro[3,2-g]chromen-7-one | 384.41 | 60.25 | 0.63 |
|     | MOL004827 | Semilicoisoflavone B                                                                                | 352.36 | 48.78 | 0.55 |
|     | MOL004828 | Glepidotin A                                                                                        | 338.38 | 44.72 | 0.35 |
|     | MOL004829 | Glepidotin B                                                                                        | 340.4  | 64.46 | 0.34 |
|     | MOL004833 | Phaseolinisoflavan                                                                                  | 324.4  | 32.01 | 0.45 |
|     | MOL004835 | Glypallichalcone                                                                                    | 284.33 | 61.6  | 0.19 |
|     | MOL004838 | 8-(6-hydroxy-2-benzofuranyl)-2,2-dimethyl-5-chromenol                                               | 308.35 | 58.44 | 0.38 |
|     | MOL004841 | Licochalcone B                                                                                      | 286.3  | 76.76 | 0.19 |
|     | MOL004848 | licochalcone G                                                                                      | 354.43 | 49.25 | 0.32 |

|           |                                                                                           |        |       |      |
|-----------|-------------------------------------------------------------------------------------------|--------|-------|------|
| MOL004849 | 3-(2,4-dihydroxyphenyl)-8-(1,1-dimethylprop-2-enyl)-7-hydroxy-5-methoxy-coumarin          | 368.41 | 59.62 | 0.43 |
| MOL004855 | Licoricone                                                                                | 382.44 | 63.58 | 0.47 |
| MOL004856 | Gancaonin A                                                                               | 352.41 | 51.08 | 0.4  |
| MOL004857 | Gancaonin B                                                                               | 368.41 | 48.79 | 0.45 |
| MOL004860 | licorice glycoside E                                                                      | 693.71 | 32.89 | 0.27 |
| MOL004863 | 3-(3,4-dihydroxyphenyl)-5,7-dihydroxy-8-(3-methylbut-2-enyl)chromone                      | 354.38 | 66.37 | 0.41 |
| MOL004864 | 5,7-dihydroxy-3-(4-methoxyphenyl)-8-(3-methylbut-2-enyl)chromone                          | 352.41 | 30.49 | 0.41 |
| MOL004866 | 2-(3,4-dihydroxyphenyl)-5,7-dihydroxy-6-(3-methylbut-2-enyl)chromone                      | 354.38 | 44.15 | 0.41 |
| MOL004879 | Glycyrin                                                                                  | 382.44 | 52.61 | 0.47 |
| MOL004882 | Licocoumarone                                                                             | 340.4  | 33.21 | 0.36 |
| MOL004883 | Licoisoflavone                                                                            | 354.38 | 41.61 | 0.42 |
| MOL004884 | Licoisoflavone B                                                                          | 352.36 | 38.93 | 0.55 |
| MOL004885 | licoisoflavanone                                                                          | 354.38 | 52.47 | 0.54 |
| MOL004891 | shinpterocarpin                                                                           | 322.38 | 80.3  | 0.73 |
| MOL004898 | (E)-3-[3,4-dihydroxy-5-(3-methylbut-2-enyl)phenyl]-1-(2,4-dihydroxyphenyl)prop-2-en-1-one | 340.4  | 46.27 | 0.31 |
| MOL004903 | liquiritin                                                                                | 418.43 | 65.69 | 0.74 |
| MOL004904 | licopyranocoumarin                                                                        | 384.41 | 80.36 | 0.65 |
| MOL004905 | 3,22-Dihydroxy-11-oxo-delta(12)-oleanene-27-alkyl-methoxycarbonyl-29-oic acid             | 512.75 | 34.32 | 0.55 |
| MOL004907 | Glyzaglabrin                                                                              | 298.26 | 61.07 | 0.35 |
| MOL004908 | Glabridin                                                                                 | 324.4  | 53.25 | 0.47 |
| MOL004910 | Glabranin                                                                                 | 324.4  | 52.9  | 0.31 |
| MOL004911 | Glabrene                                                                                  | 322.38 | 46.27 | 0.44 |
| MOL004912 | Glabrone                                                                                  | 336.36 | 52.51 | 0.5  |
| MOL004913 | 1,3-dihydroxy-9-methoxy-6-benzofurano[3,2-c]chromenone                                    | 298.26 | 48.14 | 0.43 |
| MOL004914 | 1,3-dihydroxy-8,9-dimethoxy-6-benzofurano[3,2-c]chromenone                                | 328.29 | 62.9  | 0.53 |
| MOL004915 | Eurycarpin A                                                                              | 338.38 | 43.28 | 0.37 |
| MOL004917 | glycyroside                                                                               | 562.57 | 37.25 | 0.79 |
| MOL004924 | (-)-Medicocarpin                                                                          | 432.46 | 40.99 | 0.95 |
| MOL004935 | Sigmoidin-B                                                                               | 356.4  | 34.88 | 0.41 |
| MOL004941 | (2R)-7-hydroxy-2-(4-hydroxyphenyl)chroman-4-one                                           | 256.27 | 71.12 | 0.18 |
| MOL004945 | (2S)-7-hydroxy-2-(4-hydroxyphenyl)-8-(3-methylbut-2-enyl)chroman-4-one                    | 324.4  | 36.57 | 0.32 |

|           |                                                                                |        |       |      |
|-----------|--------------------------------------------------------------------------------|--------|-------|------|
| MOL004948 | Isoglycyrol                                                                    | 366.39 | 44.7  | 0.84 |
| MOL004949 | Isolicoflavonol                                                                | 354.38 | 45.17 | 0.42 |
| MOL004957 | HMO                                                                            | 268.28 | 38.37 | 0.21 |
| MOL004959 | 1-Methoxyphaseollidin                                                          | 354.43 | 69.98 | 0.64 |
| MOL004961 | Quercetin der.                                                                 | 330.31 | 46.45 | 0.33 |
| MOL004966 | 3'-Hydroxy-4'-O-Methylglabridin                                                | 354.43 | 43.71 | 0.57 |
| MOL000497 | licochalcone a                                                                 | 338.43 | 40.79 | 0.29 |
| MOL004974 | 3'-Methoxyglabridin                                                            | 354.43 | 46.16 | 0.57 |
| MOL004978 | 2-[(3R)-8,8-dimethyl-3,4-dihydro-2H-pyrano[6,5-f]chromen-3-yl]-5-methoxyphenol | 338.43 | 36.21 | 0.52 |
| MOL004980 | Inflacoumarin A                                                                | 322.38 | 39.71 | 0.33 |
| MOL004985 | icos-5-enoic acid                                                              | 310.58 | 30.7  | 0.2  |
| MOL004988 | Kanzonol F                                                                     | 420.54 | 32.47 | 0.89 |
| MOL004989 | 6-prenylated eriodictyol                                                       | 356.4  | 39.22 | 0.41 |
| MOL004990 | 7,2',4'-trihydroxy - 5-methoxy-3 - arylcoumarin                                | 300.28 | 83.71 | 0.27 |
| MOL004991 | 7-Acetoxy-2-methylisoflavone                                                   | 294.32 | 38.92 | 0.26 |
| MOL004993 | 8-prenylated eriodictyol                                                       | 356.4  | 53.79 | 0.4  |
| MOL004996 | gadelaidic acid                                                                | 310.58 | 30.7  | 0.2  |
| MOL000500 | Vestitol                                                                       | 272.32 | 74.66 | 0.21 |
| MOL005000 | Gancaonin G                                                                    | 352.41 | 60.44 | 0.39 |
| MOL005001 | Gancaonin H                                                                    | 420.49 | 50.1  | 0.78 |
| MOL005003 | Licoagrocarpin                                                                 | 338.43 | 58.81 | 0.58 |
| MOL005007 | Glyasperins M                                                                  | 368.41 | 72.67 | 0.59 |
| MOL005008 | Glycyrrhiza flavonol A                                                         | 370.38 | 41.28 | 0.6  |
| MOL005012 | Licoagroisoflavone                                                             | 336.36 | 57.28 | 0.49 |
| MOL005013 | 18 $\alpha$ -hydroxyglycyrrhetic acid                                          | 486.76 | 41.16 | 0.71 |
| MOL005016 | Odoratin                                                                       | 314.31 | 49.95 | 0.3  |
| MOL005017 | Phaseol                                                                        | 336.36 | 78.77 | 0.58 |
| MOL005018 | Xambioona                                                                      | 388.49 | 54.85 | 0.87 |
| MOL005020 | dehydroglyasperins C                                                           | 340.4  | 53.82 | 0.37 |
| MOL000098 | quercetin                                                                      | 302.25 | 46.43 | 0.28 |

#### Additional file 2 Targets of active ingredients

| Target name                                                  | Gene name |
|--------------------------------------------------------------|-----------|
| 4-aminobutyrate aminotransferase                             | ABAT      |
| Multidrug resistance-associated protein 1                    | ABCC1     |
| Broad substrate specificity ATP-binding cassette transporter | ABCG2     |
| Acetyl-CoA carboxylase 1                                     | ACACA     |
| Acetylcholinesterase                                         | ACHE      |

|                                                           |         |
|-----------------------------------------------------------|---------|
| Prostatic acid phosphatase                                | ACP3    |
| Pituitary adenylate cyclase-activating polypeptide        | ADCYAP1 |
| All-trans-retinol dehydrogenase                           | ADH1B   |
| Alcohol dehydrogenase 1C                                  | ADH1C   |
| Adiponectin                                               | ADIPOQ  |
| Alpha-1A adrenergic receptor                              | ADRA1A  |
| Alpha-1B adrenergic receptor                              | ADRA1B  |
| Alpha-1D adrenergic receptor                              | ADRA1D  |
| Alpha-2A adrenergic receptor                              | ADRA2A  |
| Beta-1 adrenergic receptor                                | ADRB1   |
| Beta-2 adrenergic receptor                                | ADRB2   |
| Aryl hydrocarbon receptor                                 | AHR     |
| Activator of 90 kDa heat shock protein ATPase homolog 1   | AHSA1   |
| Aldo-keto reductase family 1 member B1                    | AKR1B1  |
| Aldo-keto reductase family 1 member C1                    | AKR1C1  |
| Aldo-keto reductase family 1 member C3                    | AKR1C3  |
| RAC-alpha serine/threonine-protein kinase                 | AKT1    |
| Polyunsaturated fatty acid 5-lipoxygenase                 | ALOX5   |
| Apolipoprotein B-100                                      | APOB    |
| Androgen receptor                                         | AR      |
| ATP synthase subunit beta                                 | ATP5F1B |
| Bcl2-associated agonist of cell death                     | BAD     |
| Apoptosis regulator BAX                                   | BAX     |
| Apoptosis regulator Bcl-2                                 | BCL2    |
| Bcl-2-like protein 1                                      | BCL2L1  |
| Baculoviral IAP repeat-containing protein 5               | BIRC5   |
| Carbonic anhydrase 2                                      | CA2     |
| Voltage-dependent L-type calcium channel subunit alpha-1S | CACNA1S |
| Caspase-1                                                 | CASP1   |
| Caspase-3                                                 | CASP3   |
| Caspase-8                                                 | CASP8   |
| Caspase-9                                                 | CASP9   |
| Catalase                                                  | CAT     |
| Caveolin-1                                                | CAV1    |
| C-C motif chemokine 2                                     | CCL2    |
| Cyclin-A2                                                 | CCNA2   |
| G2/mitotic-specific cyclin-B1                             | CCNB1   |
| G1/S-specific cyclin-D1                                   | CCND1   |
| Monocyte differentiation antigen CD14                     | CD14    |
| CD40 ligand                                               | CD40LG  |

|                                                          |         |
|----------------------------------------------------------|---------|
| Cyclin-dependent kinase 1                                | CDK1    |
| Cyclin-dependent kinase 2                                | CDK2    |
| Cyclin-dependent kinase 4                                | CDK4    |
| Cyclin-dependent kinase inhibitor 1                      | CDKN1A  |
| Liver carboxylesterase 1                                 | CES1    |
| Serine/threonine-protein kinase Chk1                     | CHEK1   |
| Serine/threonine-protein kinase Chk2                     | CHEK2   |
| Muscarinic acetylcholine receptor M1                     | CHRM1   |
| Muscarinic acetylcholine receptor M2                     | CHRM2   |
| Muscarinic acetylcholine receptor M3                     | CHRM3   |
| Muscarinic acetylcholine receptor M4                     | CHRM4   |
| Muscarinic acetylcholine receptor M5                     | CHRM5   |
| Neuronal acetylcholine receptor subunit alpha-2          | CHRNA2  |
| Neuronal acetylcholine receptor subunit alpha-7          | CHRNA7  |
| Inhibitor of nuclear factor kappa-B kinase subunit alpha | CHUK    |
| Claudin-4                                                | CLDN4   |
| Collagen alpha-1(I) chain                                | COL1A1  |
| Collagen alpha-1(III) chain                              | COL3A1  |
| C-reactive protein                                       | CRP     |
| Chymotrypsinogen B                                       | CTRB1   |
| Cathepsin D                                              | CTSD    |
| C-X-C motif chemokine 10                                 | CXCL10  |
| C-X-C motif chemokine 11                                 | CXCL11  |
| C-X-C motif chemokine 2                                  | CXCL2   |
| Interleukin-8                                            | CXCL8   |
| Aromatase                                                | CYP19A1 |
| Cytochrome P450 1A1                                      | CYP1A1  |
| Cytochrome P450 1A2                                      | CYP1A2  |
| Cytochrome P450 1B1                                      | CYP1B1  |
| Cytochrome P450 3A4                                      | CYP3A4  |
| DDB1- and CUL4-associated factor 5                       | DCAF5   |
| Type I iodothyronine deiodinase                          | DIO1    |
| Dipeptidase 1                                            | DPEP1   |
| Dipeptidyl peptidase 4                                   | DPP4    |
| Dopamine D1 receptor                                     | DRD1    |
| Dual oxidase 2                                           | DUOX2   |
| Transcription factor E2F1                                | E2F1    |
| Transcription factor E2F2                                | E2F2    |
| Pro-epidermal growth factor                              | EGF     |
| Epidermal growth factor receptor                         | EGFR    |

|                                                                  |        |
|------------------------------------------------------------------|--------|
| Eukaryotic translation initiation factor 6                       | EIF6   |
| ETS domain-containing protein Elk-1                              | ELK1   |
| Receptor tyrosine-protein kinase erbB-2                          | ERBB2  |
| Receptor tyrosine-protein kinase erbB-3                          | ERBB3  |
| Estrogen receptor                                                | ESR1   |
| Estrogen receptor beta                                           | ESR2   |
| Tissue factor                                                    | F3     |
| Coagulation factor VII                                           | F7     |
| Fatty acid synthase                                              | FASN   |
| Proto-oncogene c-Fos                                             | FOS    |
| Fos-related antigen 2                                            | FOSL2  |
| Gamma-aminobutyric acid receptor subunit alpha-1                 | GABRA1 |
| Gamma-aminobutyric acid receptor alpha-2 subunit                 | GABRA2 |
| Gamma-aminobutyric acid receptor subunit alpha-3                 | GABRA3 |
| Gamma-aminobutyric acid receptor subunit alpha-5                 | GABRA5 |
| Gamma-aminobutyric acid receptor subunit alpha-6                 | GABRA6 |
| Gap junction alpha-1 protein                                     | GJA1   |
| Aspartate aminotransferase                                       | GOT1   |
| Glutamate receptor 2                                             | GRIA2  |
| Glycogen synthase kinase-3 beta                                  | GSK3B  |
| Glutathione reductase                                            | GSR    |
| Glutathione S-transferase Mu 1                                   | GSTM1  |
| Glutathione S-transferase Mu 2                                   | GSTM2  |
| Glutathione S-transferase P                                      | GSTP1  |
| Hyaluronan synthase 2                                            | HAS2   |
| Hypoxia-inducible factor 1-alpha                                 | HIF1A  |
| Hexokinase-2                                                     | HK2    |
| 3-hydroxy-3-methylglutaryl-coenzyme A reductase                  | HMGCR  |
| Heme oxygenase 1                                                 | HMOX1  |
| 3 beta-hydroxysteroid dehydrogenase/Delta 5-->4-isomerase type 1 | HSD3B1 |
| 3 beta-hydroxysteroid dehydrogenase/Delta 5-->4-isomerase type 2 | HSD3B2 |
| Heat shock factor protein 1                                      | HSF1   |
| Endoplasmic reticulum chaperone BiP                              | HSPA5  |
| Heat shock protein beta-1                                        | HSPB1  |
| 5-hydroxytryptamine 2A receptor                                  | HTR2A  |
| 5-hydroxytryptamine receptor 3A                                  | HTR3A  |
| Intercellular adhesion molecule 1                                | ICAM1  |
| Interferon gamma                                                 | IFNG   |
| Insulin-like growth factor II                                    | IGF2   |
| Insulin-like growth factor-binding protein 3                     | IGFBP3 |



|                                                            |        |
|------------------------------------------------------------|--------|
| Immunoglobulin heavy constant gamma 1                      | IGHG1  |
| Inhibitor of nuclear factor kappa-B kinase subunit beta    | IKBKB  |
| Interleukin-10                                             | IL10   |
| Interleukin-1 alpha                                        | IL1A   |
| Interleukin-1 beta                                         | IL1B   |
| Interleukin-2                                              | IL2    |
| Interleukin-4                                              | IL4    |
| Interleukin-6                                              | IL6    |
| Insulin receptor                                           | INSR   |
| Interferon regulatory factor 1                             | IRF1   |
| Transcription factor AP-1                                  | JUN    |
| Potassium voltage-gated channel subfamily H member 2       | KCNH2  |
| Calcium-activated potassium channel subunit alpha-1        | KCNMA1 |
| Vascular endothelial growth factor receptor 2              | KDR    |
| Lipopolysaccharide-binding protein                         | LBP    |
| Low-density lipoprotein receptor                           | LDLR   |
| Leukotriene A-4 hydrolase                                  | LTA4H  |
| Amine oxidase [flavin-containing] A                        | MAOA   |
| Amine oxidase [flavin-containing] B                        | MAOB   |
| Microtubule-associated protein 2                           | MAP2   |
| Dual specificity mitogen-activated protein kinase kinase 4 | MAP2K4 |
| Mitogen-activated protein kinase 1                         | MAPK1  |
| Mitogen-activated protein kinase 10                        | MAPK10 |
| Mitogen-activated protein kinase 14                        | MAPK14 |
| Mitogen-activated protein kinase 3                         | MAPK3  |
| Mitogen-activated protein kinase 8                         | MAPK8  |
| Maltase-glucoamylase, intestinal                           | MGAM   |
| Interstitial collagenase                                   | MMP1   |
| 72 kDa type IV collagenase                                 | MMP2   |
| Stromelysin-1                                              | MMP3   |
| Matrix metalloproteinase-9                                 | MMP9   |
| Myeloperoxidase                                            | MPO    |
| NADH-ubiquinone oxidoreductase chain 6                     | MT-ND6 |
| Microsomal triglyceride transfer protein large subunit     | MTTP   |
| Myc proto-oncogene protein                                 | MYC    |
| Neutrophil cytosol factor 1                                | NCF1   |
| Nuclear receptor coactivator 1                             | NCOA1  |
| Nuclear receptor coactivator 2                             | NCOA2  |
| Nuclear factor erythroid 2-related factor 2                | NFE2L2 |
| NF-kappa-B inhibitor alpha                                 | NFKBIA |

|                                                                                                      |        |
|------------------------------------------------------------------------------------------------------|--------|
| Homeobox protein Nkx-3.1                                                                             | NKX3-1 |
| Nitric oxide synthase, inducible                                                                     | NOS2   |
| Nitric-oxide synthase, endothelial                                                                   | NOS3   |
| Puromycin-sensitive aminopeptidase                                                                   | NPEPPS |
| NAD(P)H dehydrogenase                                                                                | NQO1   |
| Nuclear receptor subfamily 1 group I member 2                                                        | NR1I2  |
| Nuclear receptor subfamily 1 group I member 3                                                        | NR1I3  |
| Glucocorticoid receptor                                                                              | NR3C1  |
| Mineralocorticoid receptor                                                                           | NR3C2  |
| Ornithine decarboxylase                                                                              | ODC1   |
| Oxidized low-density lipoprotein receptor 1                                                          | OLR1   |
| Delta-type opioid receptor                                                                           | OPRD1  |
| Mu-type opioid receptor                                                                              | OPRM1  |
| Poly [ADP-ribose] polymerase 1                                                                       | PARP1  |
| Procollagen C-endopeptidase enhancer 1                                                               | PCOLCE |
| CGMP-inhibited 3',5'-cyclic phosphodiesterase A                                                      | PDE3A  |
| Progesterone receptor                                                                                | PGR    |
| Phosphatidylinositol-4,5-bisphosphate 3-kinase catalytic subunit, gamma isoform                      | PIK3CG |
| cAMP-dependent protein kinase inhibitor alpha                                                        | PKIA   |
| Tissue-type plasminogen activator                                                                    | PLAT   |
| Urokinase-type plasminogen activator                                                                 | PLAU   |
| Phospholipase B1, membrane-associated                                                                | PLB1   |
| Serum paraoxonase/arylesterase 1                                                                     | PON1   |
| NADPH--cytochrome P450 reductase                                                                     | POR    |
| Peroxisome proliferator-activated receptor alpha                                                     | PPARA  |
| Peroxisome proliferator-activated receptor delta                                                     | PPARD  |
| Peroxisome proliferator-activated receptor gamma                                                     | PPARG  |
| Serine/threonine-protein phosphatase 2B catalytic subunit alpha isoform                              | PPP3CA |
| Protein kinase C alpha type                                                                          | PRKCA  |
| Protein kinase C beta type                                                                           | PRKCB  |
| Trypsin-1                                                                                            | PRSS1  |
| 26S proteasome non-ATPase regulatory subunit 3                                                       | PSMD3  |
| Proteasome assembly chaperone 1                                                                      | PSMG1  |
| Phosphatidylinositol 3,4,5-trisphosphate 3-phosphatase and dual-specificity protein phosphatase PTEN | PTEN   |
| Prostaglandin E2 receptor EP3 subtype                                                                | PTGER3 |
| Prostaglandin G/H synthase 1                                                                         | PTGS1  |
| Prostaglandin G/H synthase 2                                                                         | PTGS2  |
| Glycogen phosphorylase, muscle form                                                                  | PYGM   |

|                                                                   |          |
|-------------------------------------------------------------------|----------|
| RAF proto-oncogene serine/threonine-protein kinase                | RAF1     |
| Ras GTPase-activating protein 1                                   | RASA1    |
| Ras association domain-containing protein 1                       | RASSF1   |
| Retinoblastoma-associated protein                                 | RB1      |
| Transcription factor p65                                          | RELA     |
| Protein CBFA2T1                                                   | RUNX1T1  |
| Runt-related transcription factor 2                               | RUNX2    |
| Retinoic acid receptor RXR-alpha                                  | RXRA     |
| Retinoic acid receptor RXR-beta                                   | RXRB     |
| Retinoic acid receptor RXR-gamma                                  | RXRG     |
| Sodium channel protein type 5 subunit alpha                       | SCN5A    |
| E-selectin                                                        | SELE     |
| Plasminogen activator inhibitor 1                                 | SERPINE1 |
| NAD-dependent protein deacetylase sirtuin-1                       | SIRT1    |
| Solute carrier family 2, facilitated glucose transporter member 4 | SLC2A4   |
| Sodium-dependent noradrenaline transporter                        | SLC6A2   |
| Sodium-dependent dopamine transporter                             | SLC6A3   |
| Sodium-dependent serotonin transporter                            | SLC6A4   |
| Antileukoproteinase                                               | SLPI     |
| Sterol O-acyltransferase 1                                        | SOAT1    |
| Sterol O-acyltransferase 2                                        | SOAT2    |
| Superoxide dismutase [Cu-Zn]                                      | SOD1     |
| Osteopontin                                                       | SPP1     |
| Sterol regulatory element-binding protein 1                       | SREBF1   |
| Signal transducer and activator of transcription 1-alpha/beta     | STAT1    |
| Signal transducer and activator of transcription 3                | STAT3    |
| Sulfotransferase 1E1                                              | SULT1E1  |
| Transforming growth factor beta-1 proprotein                      | TGFB1    |
| Thrombomodulin                                                    | THBD     |
| Tumor necrosis factor                                             | TNF      |
| DNA topoisomerase 1                                               | TOP1     |
| DNA topoisomerase 2-alpha                                         | TOP2A    |
| Cellular tumor antigen p53                                        | TP53     |
| UDP-glucuronosyltransferase 1A1                                   | UGT1A1   |
| Vascular cell adhesion protein 1                                  | VCAM1    |
| Vascular endothelial growth factor A                              | VEGFA    |
| Xanthine dehydrogenase/oxidase                                    | XDH      |

---
